# Supplementary material
Source: MDPI journal article supplement (https://www.mdpi.com/2624-8549/5/1/20)
Supplement: s1 [file s1]

# Supporting information

Crystal engineering of conglomerates: Dilution of racemate-forming Fe(II) and Ni(II) congeners into conglomerate-forming [Zn(bpy)<sub>3</sub>](PF<sub>6</sub>)<sub>2</sub>

**Table S1.** Crystal data and structure refinement for [Λ-Zn(bpy)<sub>3</sub>](PF<sub>6</sub>)<sub>2</sub> and [*rac*-Ni(bpy)<sub>3</sub>](PF<sub>6</sub>)<sub>2</sub>

|                                             |                                                                                  |                                                                                 |
|---------------------------------------------|----------------------------------------------------------------------------------|---------------------------------------------------------------------------------|
| Empirical formula                           | C <sub>30</sub> H <sub>24</sub> F <sub>12</sub> N <sub>6</sub> P <sub>2</sub> Zn | C <sub>30</sub> H <sub>24</sub> F <sub>12</sub> N <sub>6</sub> NiP <sub>2</sub> |
| Formula weight                              | 823.86                                                                           | 817.187                                                                         |
| Temperature/K                               | 296.15                                                                           | 296.15                                                                          |
| Crystal system                              | trigonal                                                                         | trigonal                                                                        |
| Space group                                 | P3 <sub>2</sub>                                                                  | P-3c1                                                                           |
| a/Å                                         | 10.4744(7)                                                                       | 10.7527(4)                                                                      |
| b/Å                                         | 10.4744(7)                                                                       | 10.7527(4)                                                                      |
| c/Å                                         | 26.395(3)                                                                        | 16.5475(10)                                                                     |
| α/°                                         | 90                                                                               | 90                                                                              |
| β/°                                         | 90                                                                               | 90                                                                              |
| γ/°                                         | 120                                                                              | 120                                                                             |
| Volume/Å <sup>3</sup>                       | 2507.9(4)                                                                        | 1656.91(13)                                                                     |
| Z                                           | 3                                                                                | 2                                                                               |
| ρ <sub>calc</sub> /cm <sup>3</sup>          | 1.637                                                                            | 1.638                                                                           |
| μ/mm <sup>-1</sup>                          | 0.930                                                                            | 0.783                                                                           |
| F(000)                                      | 1242.0                                                                           | 825.7                                                                           |
| Crystal size/mm <sup>3</sup>                | 0.32 × 0.23 × 0.14                                                               | 0.4 × 0.15 × 0.12                                                               |
| Radiation                                   | MoKα (λ = 0.71073)                                                               | Mo Kα (λ = 0.71073)                                                             |
| 2θ range for data collection/°              | 1.542 to 56.606                                                                  | 6.58 to 56.66                                                                   |
| Index ranges                                | -13 ≤ h ≤ 13, -13 ≤ k ≤ 13, -35 ≤ l ≤ 35                                         | -14 ≤ h ≤ 14, -14 ≤ k ≤ 14, -22 ≤ l ≤ 22                                        |
| Reflections collected                       | 141892                                                                           | 73292                                                                           |
| Independent reflections                     | 8163 [R <sub>int</sub> = 0.0289, R <sub>sigma</sub> = 0.0109]                    | 1365 [R <sub>int</sub> = 0.0266, R <sub>sigma</sub> = 0.0057]                   |
| Data/restraints/parameters                  | 8163/1/461                                                                       | 1365/0/78                                                                       |
| Goodness-of-fit on F <sup>2</sup>           | 0.802                                                                            | 1.060                                                                           |
| Final R indexes [I ≥ 2σ (I)]                | R <sub>1</sub> = 0.0304, wR <sub>2</sub> = 0.0857                                | R <sub>1</sub> = 0.0549, wR <sub>2</sub> = 0.1716                               |
| Final R indexes [all data]                  | R <sub>1</sub> = 0.0309, wR <sub>2</sub> = 0.0866                                | R <sub>1</sub> = 0.0599, wR <sub>2</sub> = 0.1857                               |
| Largest diff. peak/hole / e Å <sup>-3</sup> | 0.32/-0.23                                                                       | 0.97/-0.50                                                                      |
| Flack parameter                             | 0.0075(17)                                                                       | C <sub>30</sub> H <sub>24</sub> F <sub>12</sub> N <sub>6</sub> NiP <sub>2</sub> |

**Table S2.** Phase determination of [M(bpy)<sub>3</sub>](PF<sub>6</sub>)<sub>2</sub> crystals using single crystal X-ray diffraction.

| M  | Crystallization method                      | a         | c         | phase |
|----|---------------------------------------------|-----------|-----------|-------|
| Fe | MeCN evaporation                            | 10.29(16) | 16.0(2)   | β     |
| Fe | Acetone evaporation                         | 10.83(4)  | 16.87(6)  | β     |
| Ni | Acetone evaporation                         | 10.79(4)  | 16.58(6)  | β     |
| Ni | CH <sub>2</sub> Cl <sub>2</sub> evaporation | 10.76(2)  | 16.57(3)  | β     |
| Ni | CH <sub>2</sub> Cl <sub>2</sub> evaporation | 10.85(3)  | 16.69(4)  | β     |
| Ni | MeCN evaporation                            | 10.74(8)  | 16.45(11) | β     |
| Mn | CH <sub>2</sub> Cl <sub>2</sub> evaporation | 10.53(4)  | 26.53(11) | γ     |
| Mn | Acetone evaporation                         | 10.61(4)  | 26.79(11) | γ     |
| Co | CH <sub>2</sub> Cl <sub>2</sub> evaporation | 10.63(13) | 25.3(3)   | γ     |
| Co | MeCN evaporation                            | 10.35(4)  | 26.21(11) | γ     |
| Cu | MeCN evaporation                            | 10.43(3)  | 26.30(6)  | γ     |
| Cu | Acetone evaporation                         | 10.46(3)  | 26.38(7)  | γ     |
| Cu | CH <sub>2</sub> Cl <sub>2</sub> evaporation | 10.54(6)  | 26.53(15) | γ     |
| Zn | Acetone evaporation                         | 10.65(9)  | 26.9(2)   | γ     |
| Zn | MeCN evaporation                            | 10.58(2)  | 26.62(6)  | γ     |

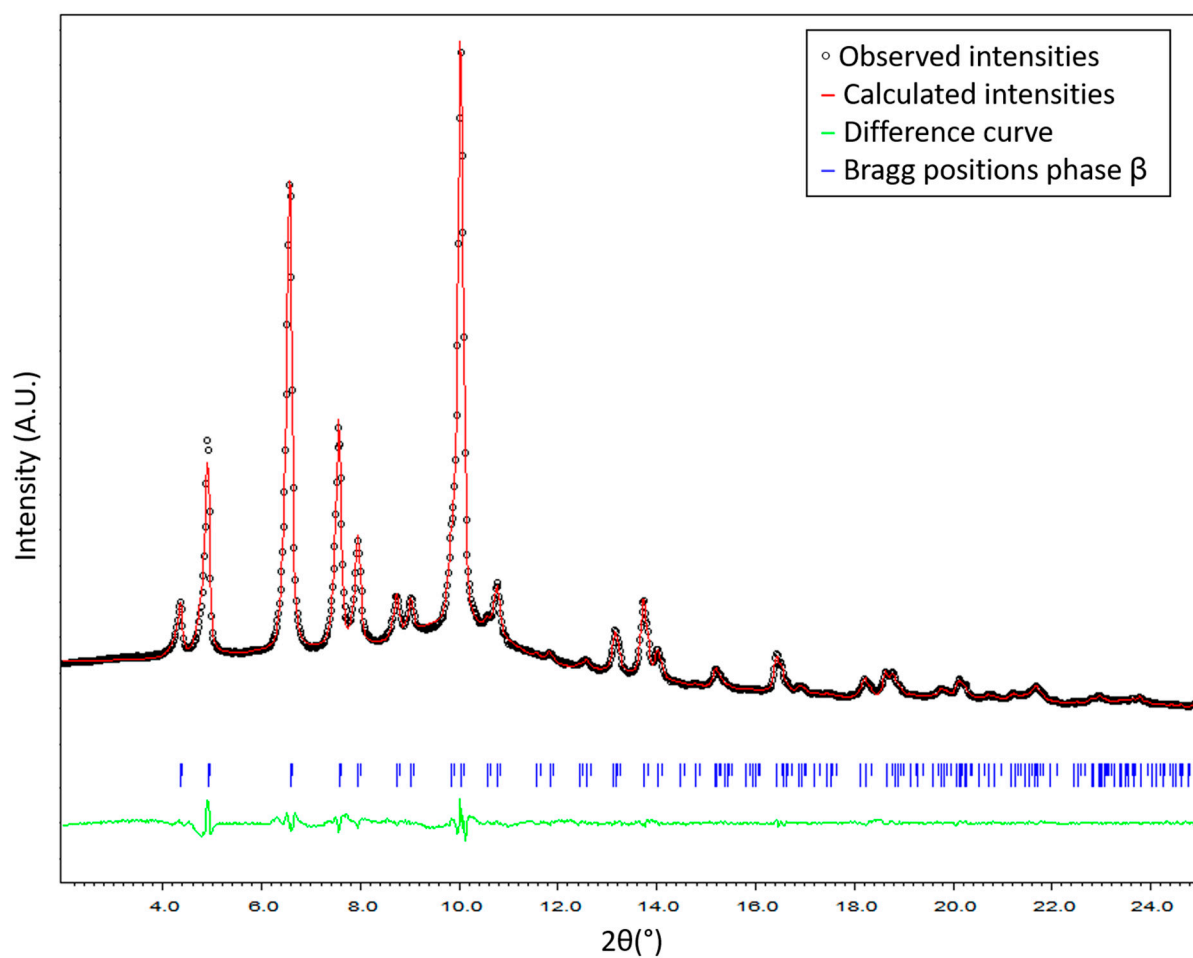

**Figure S1.** Profile matching refinement (Le Bail method) for ground single crystals of  $[\text{Ni}(\text{bpy})_3](\text{PF}_6)_2$  showing an unique  $\beta$  phase. Lattice parameters:  $a=b= 10.747(1) \text{ \AA}$ ,  $c= 16.541(2) \text{ \AA}$ ,  $\alpha=\beta=90^\circ$ ,  $\gamma=120^\circ$ .  $\text{cwRp} = 0.073$ ;  $\text{Goof} = 2.53$  (where  $\text{cwRp}$  is the background corrected  $\text{wRp}$  factor,  $\text{MoK}\alpha_{12}$  radiation).

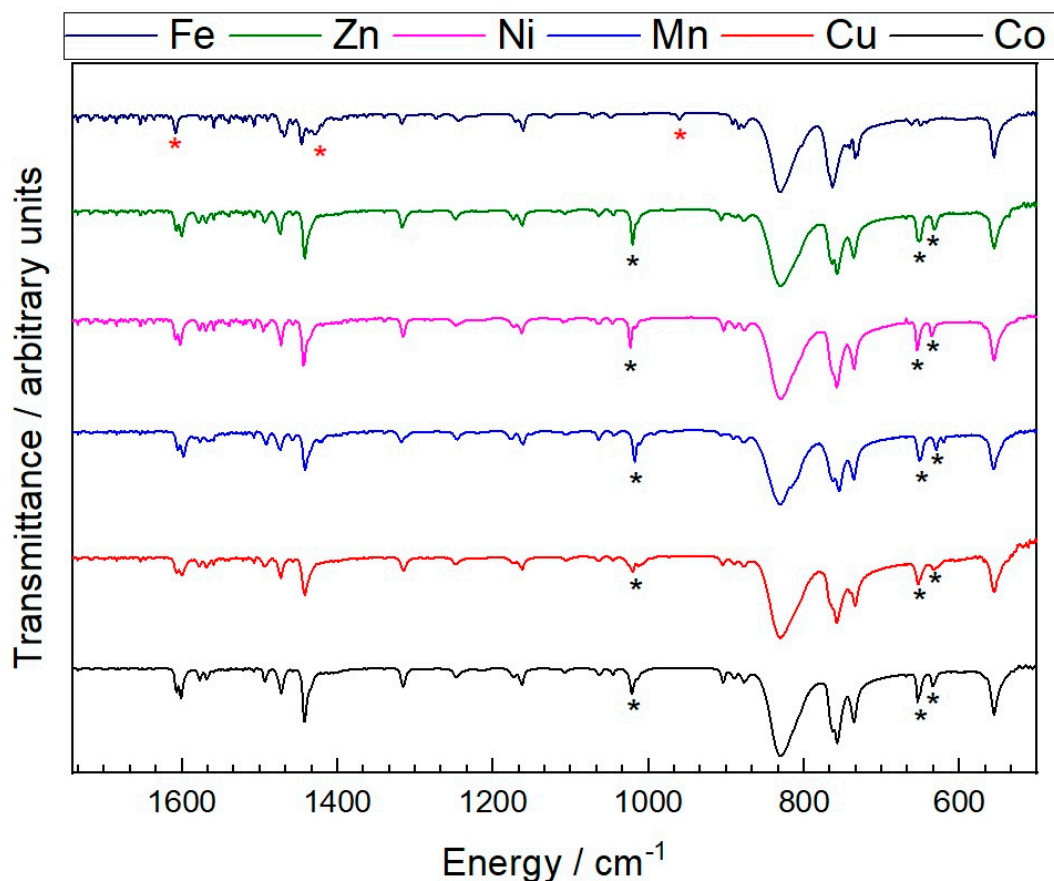

**Figure S2.** Infrared spectra of the precipitated powders. Peaks appearing only in the racemic phase denoted by red asterisk; peaks appearing only in the conglomerate phase denoted by black asterisks.

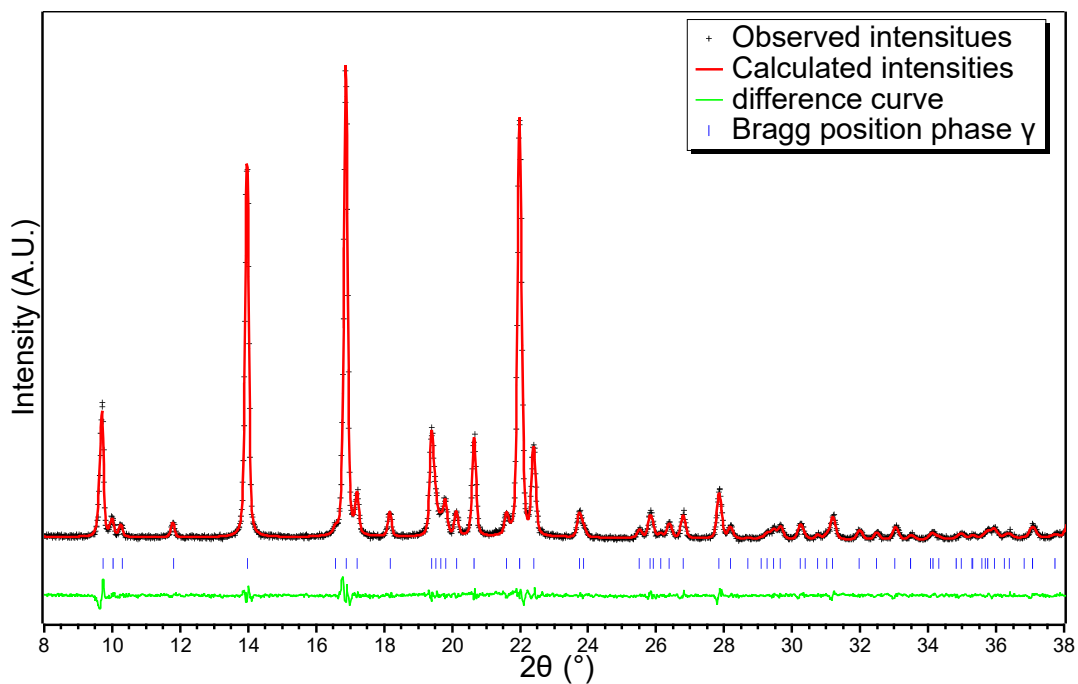

**Figure S3.** Profile matching refinement (Le Bail method) on the X-ray diffractogram for a co-precipitation of  $[\text{Ni}(\text{bpy})_3](\text{PF}_6)_2$  with  $[\text{Zn}(\text{bpy})_3](\text{PF}_6)_2$ , showing an unique  $\gamma$  phase of  $[\text{Ni}_x\text{Zn}_{(1-x)}(\text{bpy})_3](\text{PF}_6)_2$  for  $x = 0.3$ .  $\text{cwRp} = 0.11$  ;  $\text{Goof} = 1.34$  (where  $\text{cwRp}$  is the background corrected  $\text{wRp}$  factor,  $\text{CuK}\alpha_{12}$  radiation).

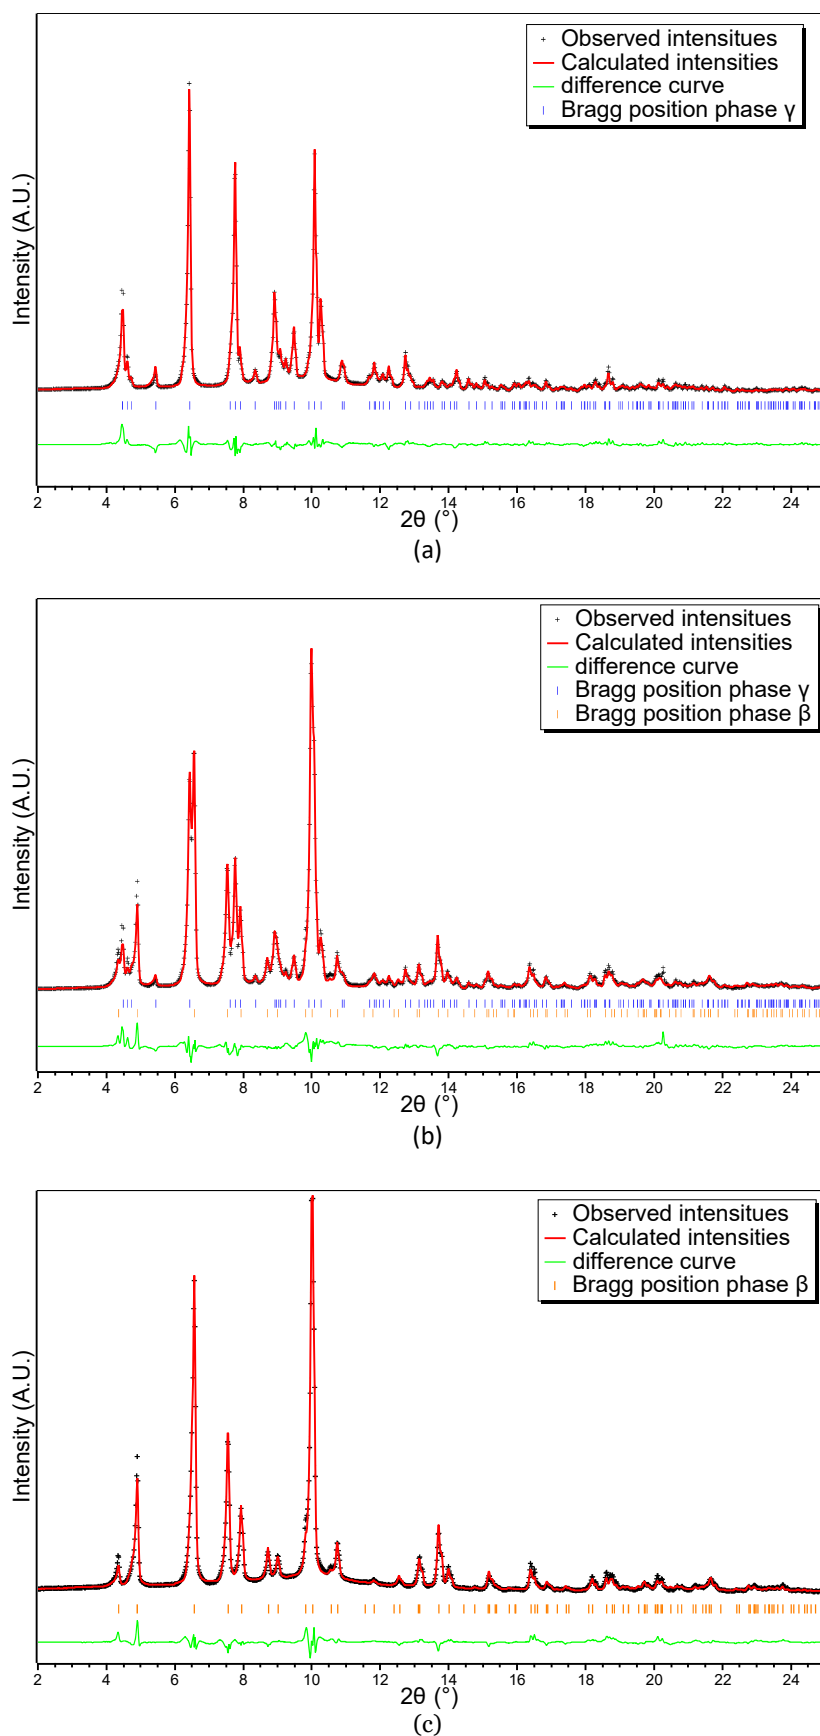

**Figure S4.** Rietveld refinement on X-ray diffractograms for ground single crystals of  $[\text{Ni}_x\text{Zn}_{1-x}(\text{bpy})_3](\text{PF}_6)_2$  for (a)  $x = 0.1$ , showing an unique  $\gamma$  phase (cwRp = 0.12 ; wR2 = 0.09), (b)  $x = 0.4$  showing a mixture of  $\gamma$  and  $\beta$  phases (cwRp = 0.13 ; wR2 = 0.10) and (c) for  $x = 0.9$  showing an unique  $\beta$  phase (cwRp = 0.13 ; wR2 = 0.13) . cwRp is the background corrected profile reliability factor and wR2 the structural reliability factor.

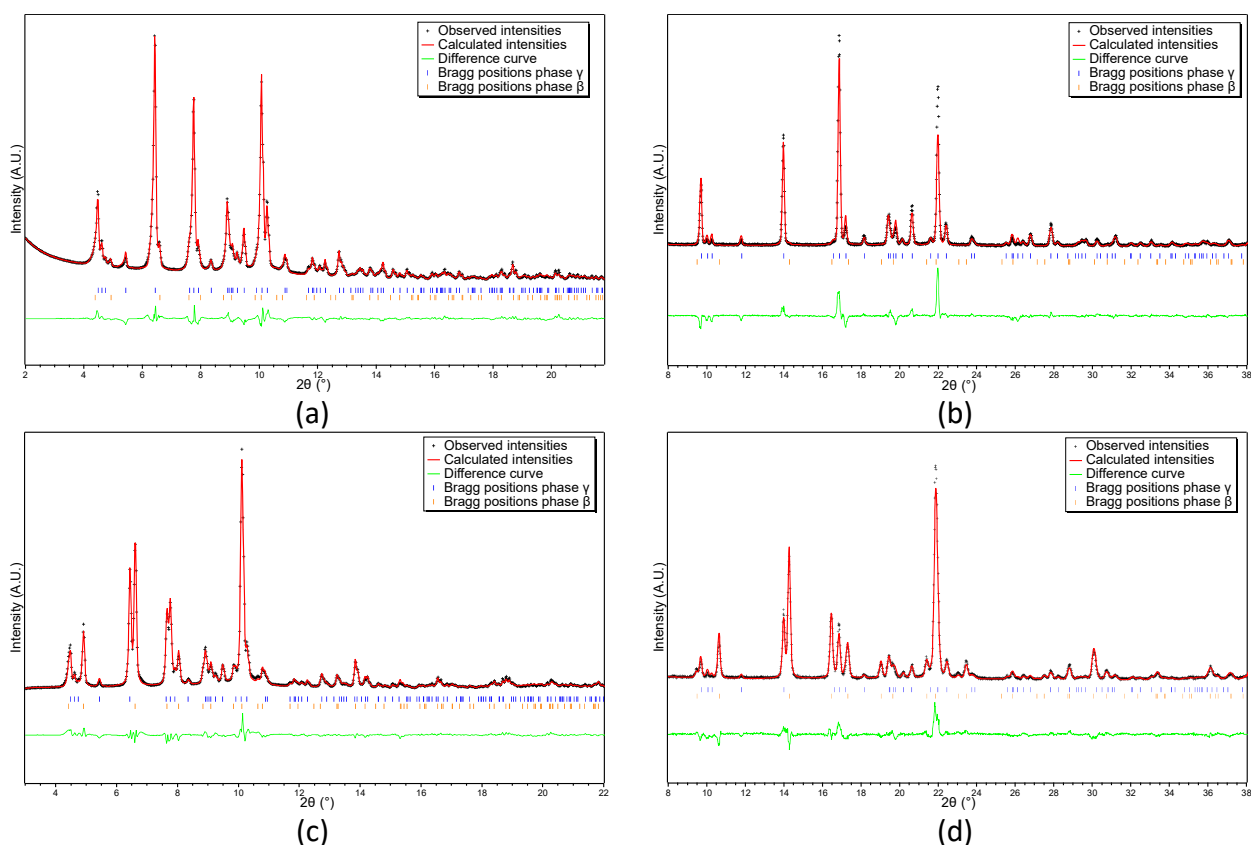

**Figure S5.** Rietveld refinement on X-ray diffractograms for ground single crystals **(a)** and **(c)** and powders **(b)** and **(d)** of  $[\text{Fe}_x\text{Zn}_{1-x}(\text{bpy})_3](\text{PF}_6)_2$  showing a mixture of  $\gamma$  and  $\beta$  phases for (a) and (b) :  $x = 0.1$  and %  $\beta = 7\%$  and  $1\%$  respectively and (c) and (d) :  $x = 0.4$  and %  $\beta = 54\%$  and  $65\%$  respectively. (a)  $\text{cwRp} = 0.10$  ;  $\text{wR2} = 0.08$  ; (b)  $\text{cwRp} = 0.27$  ;  $\text{wR2} = 0.16$  ; (c)  $\text{cwRp} = 0.11$  ;  $\text{wR2} = 0.08$  ; (d)  $\text{cwRp} = 0.20$  ;  $\text{wR2} = 0.09$  (where  $\text{cwRp}$  is the background corrected profile reliability factor and  $\text{wR2}$  the mean structural reliability factor,  $\text{MoK}\alpha_{12}$  radiation for ground single crystals and  $\text{CuK}\alpha_{12}$  radiation for powders).

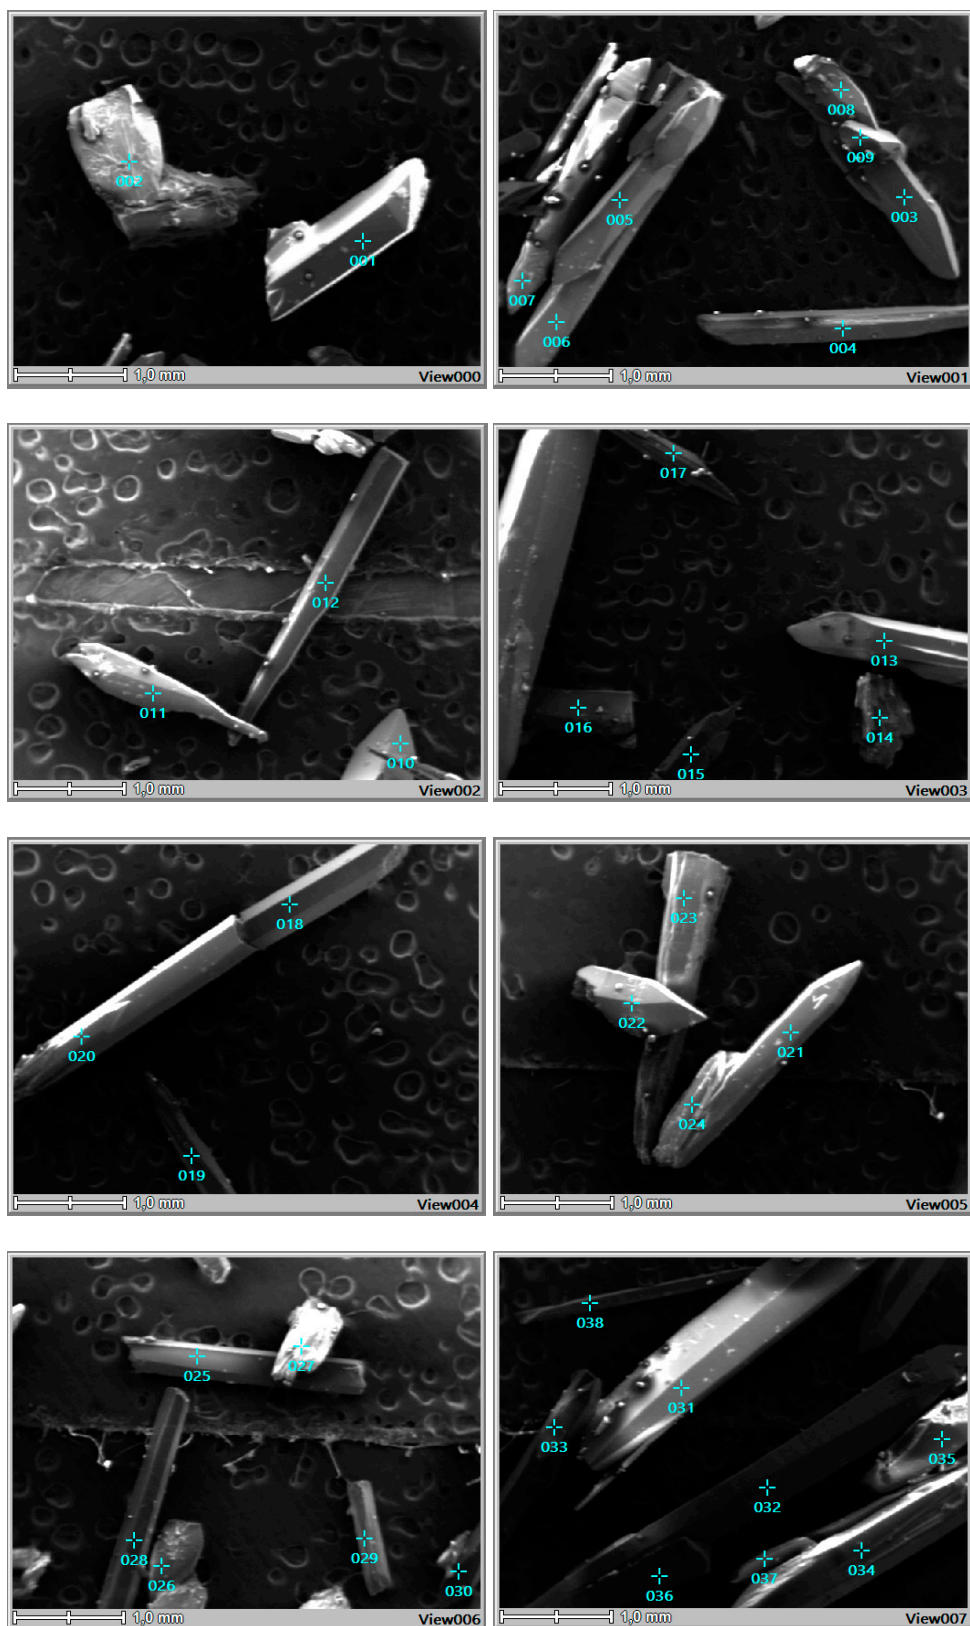

**Figure S6a.** SEM images of  $[\text{Ni}_{0.4}\text{Zn}_{0.6}(\text{bpy})_3](\text{PF}_6)_2$ . Blue crosses show the point where metal content was assayed by EDX. See table S3 for metal assay at the labeled points.

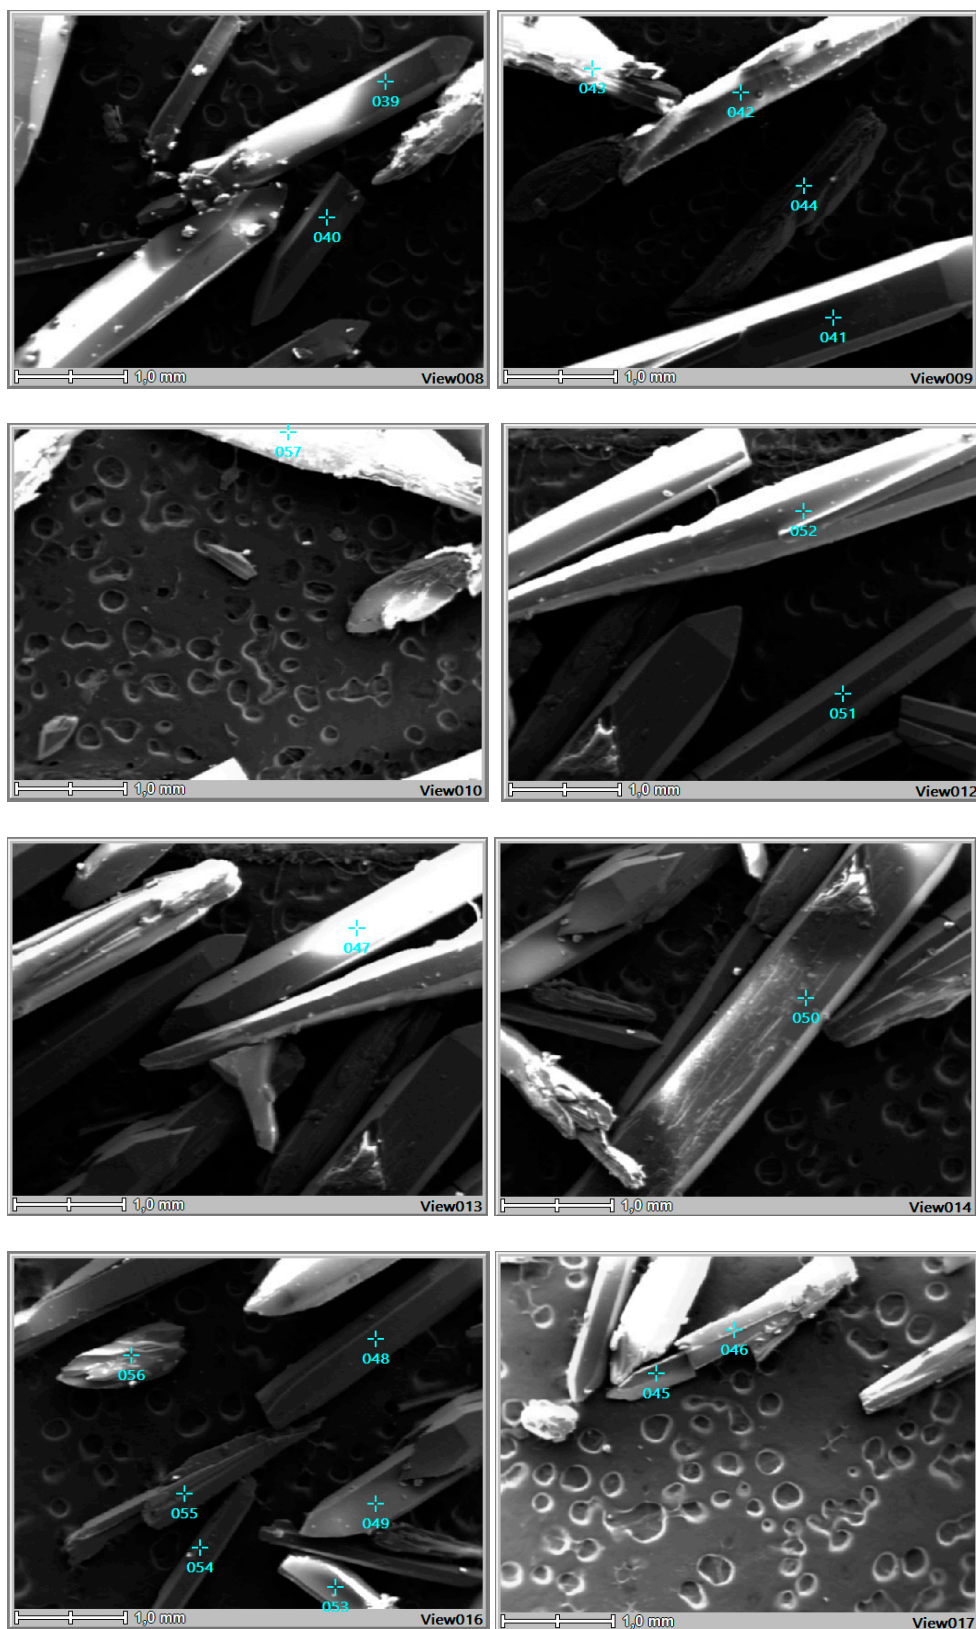

**Figure S6b.** SEM images of  $[\text{Ni}_{0.4}\text{Zn}_{0.6}(\text{bpy})_3](\text{PF}_6)_2$ . Blue crosses show the point where metal content was assayed by EDX. See table S3 for metal assay at the labeled points.

**Table S3.** Nickel and zinc proportions measured by EDX at the points corresponding to the blue crosses in Figures S6a and S6b.

| Marker | Ni At% | Zn At% | Marker | Ni At% | Zn At% |
|--------|--------|--------|--------|--------|--------|
| 1      | 37.10  | 62.90  | 30     | 43.29  | 56.71  |
| 2      | 57.00  | 43.00  | 31     | 35.56  | 64.44  |
| 3      | 25.97  | 74.03  | 32     | 28.94  | 71.06  |
| 4      | 55.83  | 44.17  | 33     | 27.79  | 72.21  |
| 5      | 32.99  | 67.01  | 34     | 58.01  | 41.99  |
| 6      | 28.78  | 71.22  | 35     | 37.83  | 62.17  |
| 7      | 30.95  | 69.05  | 36     | 51.36  | 48.64  |
| 8      | 24.76  | 75.24  | 37     | 66.60  | 33.40  |
| 9      | 30.47  | 69.53  | 38     | 49.37  | 50.63  |
| 10     | 28.50  | 71.50  | 39     | 64.40  | 35.60  |
| 11     | 40.97  | 59.03  | 40     | 30.17  | 69.83  |
| 12     | 33.78  | 66.22  | 41     | 36.35  | 63.65  |
| 13     | 36.28  | 63.72  | 42     | 37.57  | 62.43  |
| 14     | 46.73  | 53.27  | 43     | 57.15  | 42.85  |
| 15     | 44.10  | 55.90  | 44     | 49.40  | 50.60  |
| 16     | 53.24  | 46.76  | 57     | 56.05  | 43.95  |
| 17     | 62.27  | 37.73  | 51     | 34.40  | 65.60  |
| 18     | 33.48  | 66.52  | 52     | 36.94  | 63.06  |
| 19     | 59.21  | 40.79  | 47     | 37.26  | 62.74  |
| 20     | 31.74  | 68.26  | 50     | 53.36  | 46.64  |
| 21     | 38.07  | 61.93  | 48     | 57.58  | 42.42  |
| 22     | 28.00  | 72.00  | 49     | 30.84  | 69.16  |
| 23     | 52.37  | 47.63  | 53     | 61.23  | 38.77  |
| 24     | 56.64  | 43.36  | 54     | 66.55  | 33.45  |
| 25     | 29.14  | 70.86  | 55     | 41.82  | 58.18  |
| 26     | 36.54  | 63.46  | 56     | 36.70  | 63.30  |
| 27     | 35.77  | 64.23  | 45     | 58.54  | 41.46  |
| 28     | 45.76  | 54.24  | 46     | 48.58  | 51.42  |
| 29     | 61.24  | 38.76  |        |        |        |



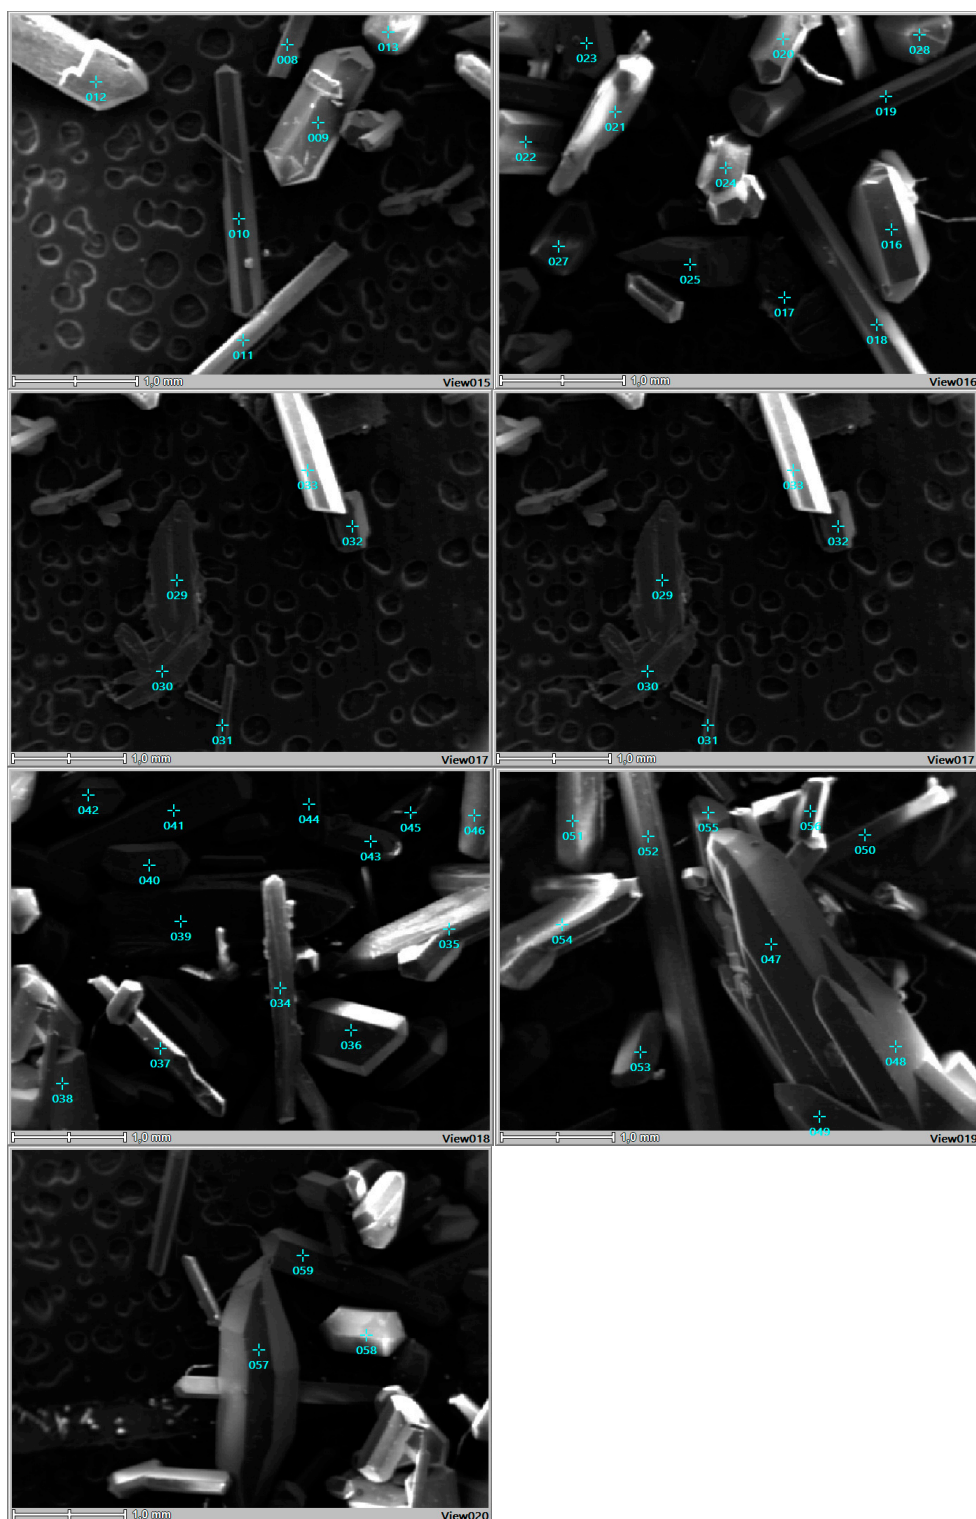

**Figure S7.** SEM images of  $[\text{Fe}_{0.5}\text{Zn}_{0.5}(\text{bpy})_3](\text{PF}_6)_2$ . Blue crosses show the point where metal content was assayed by EDX. See table S4 for metal assay at the labeled points.

**Table S4.** Nickel and zinc proportions measured by EDX at the points corresponding to the blue crosses in Figure S7.

| Marker | Fe At% | Zn At% | Marker2 | Fe At%3 | Zn At% |
|--------|--------|--------|---------|---------|--------|
| 7      | 58.07  | 41.93  | 36      | 71.56   | 28.44  |
| 8      | 70.65  | 29.35  | 37      | 69.58   | 30.42  |
| 9      | 88.89  | 11.11  | 38      | 70.87   | 29.13  |
| 10     | 62.11  | 37.89  | 39      | 2.52    | 97.48  |
| 11     | 62.92  | 37.08  | 40      | 72.24   | 27.76  |
| 12     | 77.07  | 22.93  | 41      | 58.53   | 41.47  |
| 13     | 85.24  | 14.76  | 42      | 63.87   | 36.13  |
| 16     | 64.47  | 35.53  | 43      | 69.44   | 30.56  |
| 17     | 5.30   | 94.70  | 44      | 74.75   | 25.25  |
| 18     | 2.94   | 97.06  | 45      | 64.81   | 35.19  |
| 19     | 81.46  | 18.54  | 46      | 54.49   | 45.51  |
| 20     | 65.01  | 34.99  | 47      | 2.42    | 97.58  |
| 21     | 4.96   | 95.04  | 48      | 2.45    | 97.55  |
| 22     | 89.09  | 10.91  | 49      | 1.83    | 98.17  |
| 23     | 73.73  | 26.27  | 50      | 55.46   | 44.54  |
| 24     | 67.66  | 32.34  | 51      | 71.13   | 28.87  |
| 25     | 3.42   | 96.58  | 52      | 57.04   | 42.96  |
| 27     | 63.9   | 36.10  | 53      | 65.81   | 34.19  |
| 28     | 66.39  | 33.61  | 54      | 6.13    | 93.87  |
| 29     | 1.37   | 98.63  | 55      | 59.29   | 40.71  |
| 30     | 0.91   | 99.09  | 56      | 60.52   | 39.48  |
| 31     | 81.27  | 18.73  | 57      | 2.74    | 97.26  |
| 32     | 72.23  | 27.77  | 58      | 74.75   | 25.25  |
| 33     | 59.62  | 40.38  | 59      | 58.63   | 41.37  |
| 34     | 61.32  | 38.68  |         |         |        |

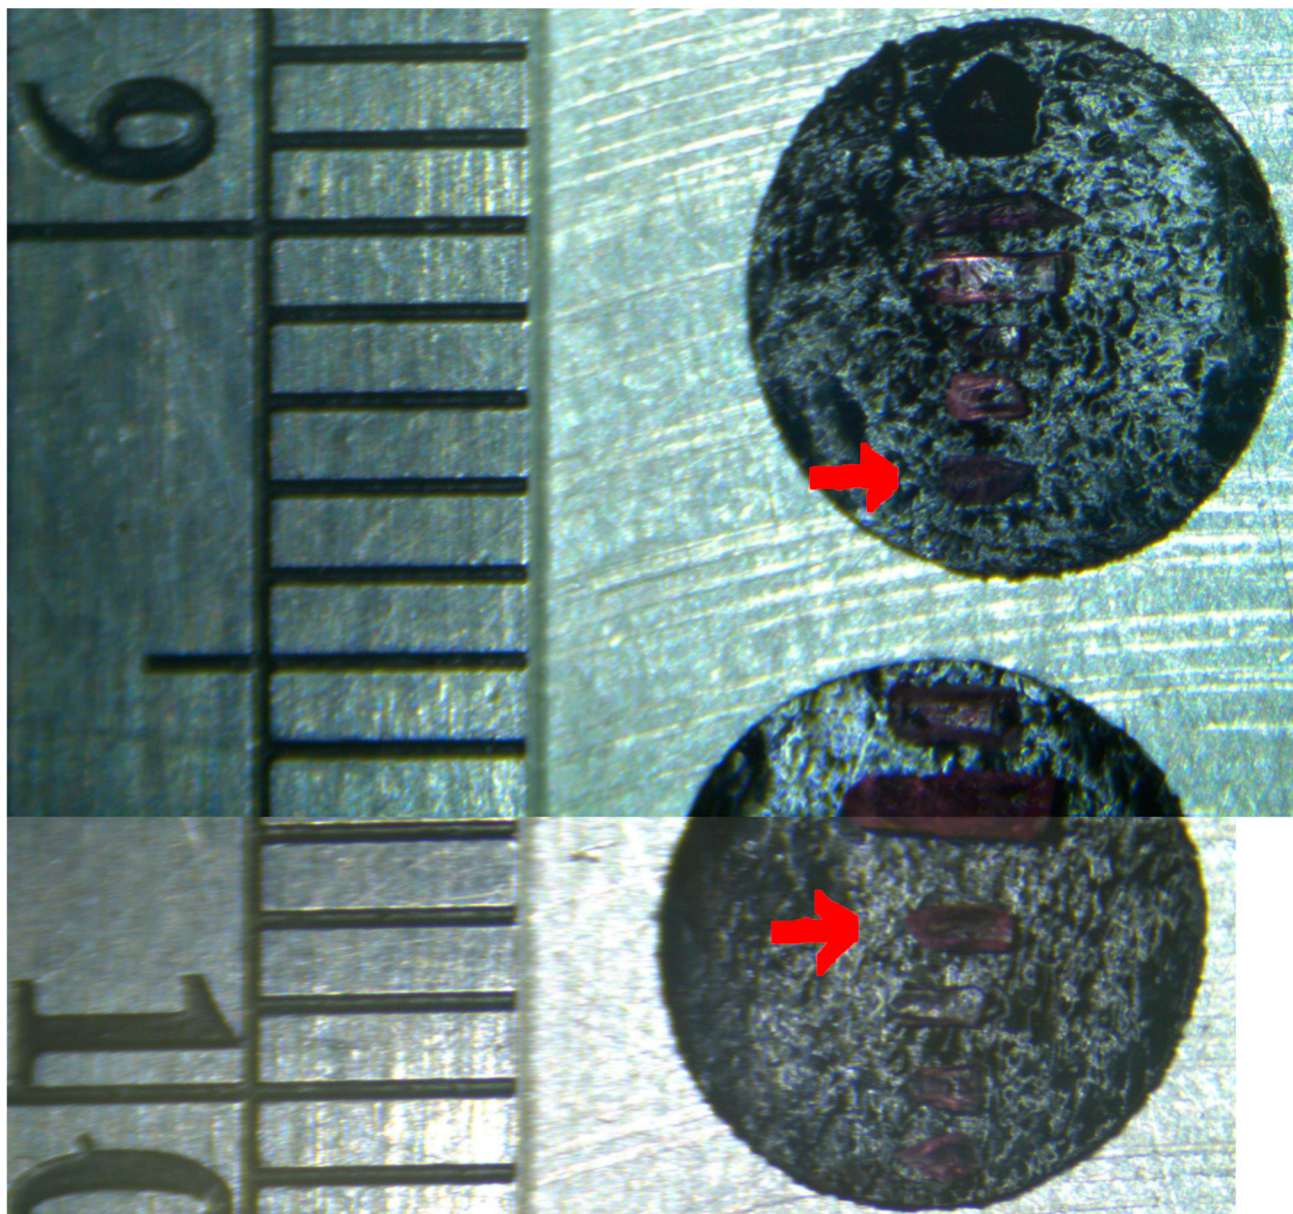

**Figure S8.** Sample mounting for X-ray Natural Circular Dichroism, crystals were glued to carbon tape pads with the *c* axis lying horizontal. The sample holder can be rotated along the vertical of the representation, with the X-ray beam normal to the picture. Measurements reported herein were performed on the crystals indicated by the red arrows.

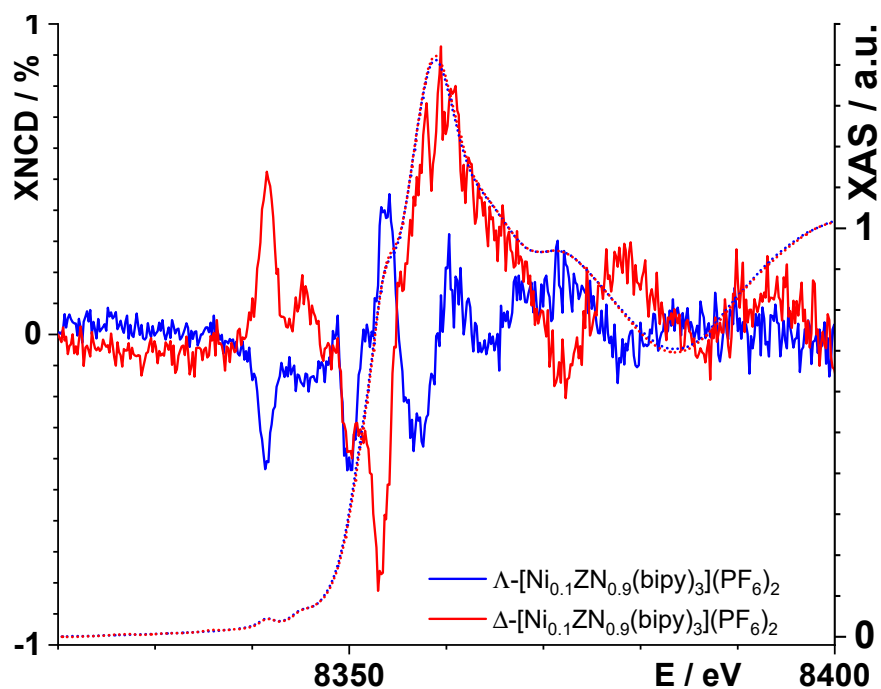

**Figure S9.** Absorption (dotted lines) and XNCD (full lines) spectra for single crystals, in orthoaxial configuration respective to the beam, for the  $\Delta$  (in red) and  $\Lambda$  (in blue) enantiomers of  $\text{Ni}_{0.1}\text{Zn}_{0.9}(\text{bpy})_3(\text{PF}_6)_2$ . EDX measurements on both enantiomers gave proportions of  $\text{Ni}_{0.106}\text{Zn}_{0.894}$  for  $\Delta$  and  $\text{Ni}_{0.12}\text{Zn}_{0.88}$  for  $\Lambda$ .

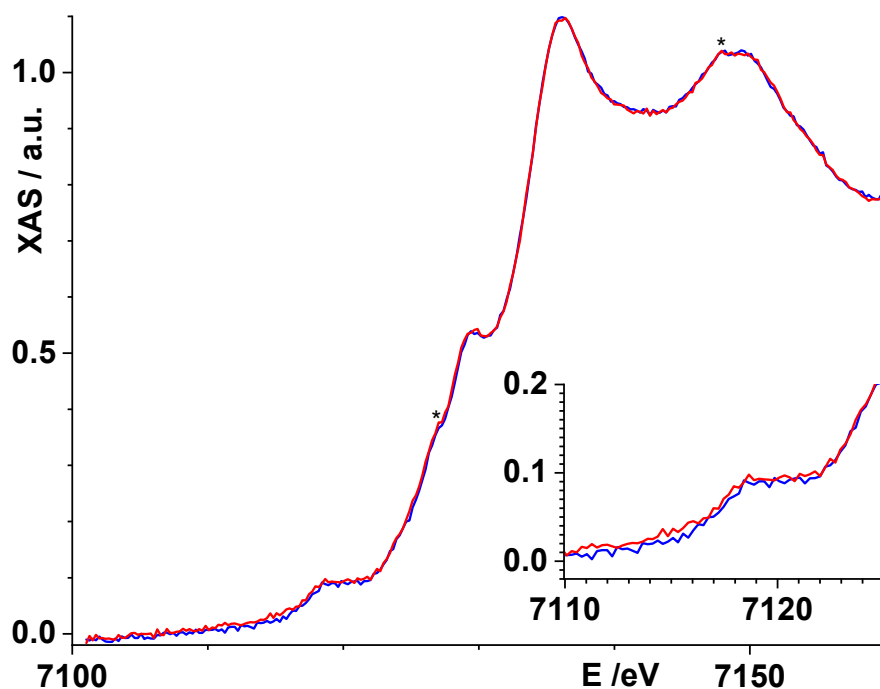

**Figure S10.** X-ray absorption spectra for both circular polarizations of the beam (red and blue lines) on a single crystal of the  $\Delta$  enantiomer of  $\text{Fe}_{0.1}\text{Zn}_{0.9}(\text{bpy})_3(\text{PF}_6)_2$ , in orthoaxial configuration respective to the beam. Diffraction peaks present in this pair of spectra are signaled with a \*. (inset) zoom on the pre-edge region.
